# Supplementary material for: Resveratrol Inhibits Proliferation and Differentiation of Porcine Preadipocytes by a Novel LincRNA-ROFM/miR-133b/AdipoQ Pathway
Source: MDPI journal article supplement (doi:10.3390/foods11172690), 2022-09-03
Supplement: s1 [file s1]

# Resveratrol inhibits proliferation and differentiation of porcine preadipocytes by a novel *LincRNA-ROFM/miR-133b/AdipoQ* pathway

Qinyang Jiang <sup>1,†</sup>, Sanbao Zhang <sup>1,†</sup>, Xiaotong Gao <sup>1</sup>, Yan Hu<sup>1</sup>, Yu Zhang<sup>1</sup>, Yujian Shen<sup>1</sup>, Yuhang Jiang<sup>1</sup> and Yanna Huang <sup>1,\*</sup>

<sup>1</sup> College of Animal Science and Technology, Guangxi University, Nanning Guangxi 530004, China

\* Correspondence: huangyn@gxu.edu.cn (Y.H.)

† The authors contributed equally to this work.

**Table S1.** Primers for RACE experiments.

| Primer name    | Primer sequence                    |
|----------------|------------------------------------|
| rMSTRG.9710-F1 | 5'-CCCTCAAAGCGGCTGAGGAAGGCTTT-3'   |
| rMSTRG.9710-F2 | 5'-GGGATCAAATATGCGGTACAGGTCAAG-3'  |
| rMSTRG.9710-R1 | 5'-CTTCCTTTCTGTGCTTGCTCTGCTGTGA-3' |
| rMSTRG.9710-R2 | 5'-GGGCTCAGTCCTGAGCTGCCCAG-3'      |

**Table S2.** Specific primers used for RT-qPCR.

| Sequence definition | Sense primer (5'→3')                          | Antisense primer (5'→3')                        | Product length (bp) |
|---------------------|-----------------------------------------------|-------------------------------------------------|---------------------|
| MSTRG.1887          | GCTGCCTCATTTGTTTCATCACC                       | GGCCCAACCAGAATACCCTA                            | 187                 |
| MSTRG.3001          | TTTGGAGCAGGTGCTTTCTG                          | CTGCTGCCAAGGTTCAGTA                             | 76                  |
| MSTRG.2752          | CACTGGAGCAATAAGCCCCT                          | TCCGGTATGAACACTTGAGC                            | 130                 |
| MSTRG.8460          | CATGCACTTGGATGAAAACCG                         | TGAATCCGAAGCAGTAGCCTT                           | 177                 |
| MSTRG.932           | ATTAGAGCGGCTTTCCTTCCG                         | GGCTCTGAGAAGACAAGCTCA                           | 163                 |
| MSTRG.14945         | AAACTCCCTGCCCTTCGCTT                          | ACTGCTGCTTCTCAGGGATAG                           | 134                 |
| MSTRG.3917          | TGGAGACAGCTCTGCGAATC                          | TGGAGGACCGTCCAAAGTCA                            | 155                 |
| MSTRG.9710          | CACAGAAAGGAAGGCTTTCAGG                        | TTCTTGCTTACGATGTCCTT                            | 90                  |
| GSTM3               | GGTACTGGGATATTCGCGGG                          | GAGCTTGTTCTCCCGTCCA                             | 195                 |
| GNTI3               | ATGGGGAGAAAGCGGCGAAA                          | AGCCGTCCCATGGCTCTAA                             | 196                 |
| lincRNA-ROFM ORF1   | gtggtggtggtgctcgagATGAGCTCTTCACAAC<br>CCAGGA  | tcgagctcgtcgacaagcttCTAAGCCTTTCACAG<br>GCTGC    | 327                 |
| lincRNA-ROFM ORF2   | gtggtggtggtggtgctcgagATGCGCAGCCAAAATC<br>CTAG | tcgagctcgtcgacaagcttTCAGCACCTCTGTAA<br>TGTCTGGG | 582                 |
| PCNA                | GCATGGACTCGTCTCATGTCT                         | TTGGACATGCTGGTGAGGTT                            | 115                 |
| cyclin D2           | GTGCTGGGCAAGTTGAAGTG                          | GCGAAGTTGAAGTCAGTGGC                            | 158                 |
| cyclin E2           | GAGCGGTAGCGGGTCTG                             | GCTTCTTGAGGGGAATCCGT                            | 120                 |
| PPAR <sub>γ</sub>   | CCGAGAGCTGATCCAATGGT                          | GAACCCCGAGGCTTTATCCC                            | 198                 |
| aP2                 | AGTTCCAGTTCCTCCCAAATC                         | CGTCTCTGAAGTTCCTCCAC                            | 168                 |
| C/EBP <sub>α</sub>  | GGCATCTGCGAACACGAGAC                          | CCGGCTGTGCTGAAACAGGT                            | 99                  |
| U6                  | TGGAACGCTTCACGAATTTGCC                        | GGAACGATACAGAGAAGATTAGC                         | 87                  |
| AdipoQ              | CGAGGTGGTCAAGGCTAAG                           | CAATGGCGTGGAGAAATAC                             | 172                 |
| C/EBP <sub>α</sub>  | GGCATCTGCGAACACGAGAC                          | CCGGCTGTGCTGAAACAGGT                            | 99                  |
| C/EBP <sub>β</sub>  | CGACAGTTCGGAGCCAGGAA                          | TCCGCTCTGAGTAGAAGTTG                            | 99                  |
| HSL                 | CTTTCGCGGTATTTCGGGAACA                        | ATGCTGCGGCGGTTGGA                               | 192                 |
| PPAR <sub>α</sub>   | CATCCTCGCGGGAAGG                              | GGCCATACACAGTGTCTCCATGT                         | 70                  |
| AMPK <sub>α</sub>   | AACATGGACGGGTGAAGAG                           | CGCAGAACTCACCATCTGA                             | 193                 |
| AdipoR2             | CCTCTTACAAGCCACC                              | AGTCAGGCAGCACATCG                               | 101                 |
| AdipoR1             | CGAGGTGGTCAAGGCTAAG                           | CAATGGCGTGGAGAAATAC                             | 172                 |
| 18S                 | CCCACGGAATCGAGAAAGAG                          | TTGACGGAAGGGCACCA                               | 122                 |

**File S1.** Full length sequence of *LincRNA-ROFM*.

CGCTGGAAAGAGGAGCTTCCGCGCGCAGAGGCTGAGGGCTGCTCGCTTCCCGCCCACACTCGGACCTTGGCTCTGGCGGG  
GAGTTGGCCCTCCGCGCTCGCTGGGCAAACAAGCCAGAAGCTGAACAAAGGCAGGACTCTTTCTCTTCCCTTCCCTTCCCT  
TCCCTGAGGGCGTCATTTAGCCTCGTTCCTTCAGGCTCTGACTGCCAACTTCAGGCCAAGGAATGGAGACCTGAAATCGG  
CCCCTGTTTCAGGAGGAGCAGGACCCTCTCCCTGCATTTGGGAATCCGTGACAGCTGCGGTCTCCTGAGCAGACCATCCG  
TGGGAGGGGAAGAAACGCCCAGGTGTCCTATGATGATGTCCTGTGTCATCTGTGACCTGTGGTACACTCTGCACAAGAACAG  
TGTCTAGCTGCCAGCATTCTCTTTGAAGGCTCAAGATTATGTTAGAACCAGGACAACAGGACATAGGTTGGTCTTTGGT  
TCCTTTTCTCTGTGTAGAATATTTTACAAGGTGGTAGGTATATGAAGATAGATGAGGCGTTCCCATCATGGCTGGGTGGTTA  
ACAAACCCGACTAGTATCCAGGAGGACCCAGGTTTGATCCCTGGCCTTTCCCAGTGGGTAAAGATCCAGAGTTGCCTTGA  
GCTGTGTGGTGTAGGTGCGAGGCGCAGCTCACATCTGGCGTTGCTGTGGCTGTGGTGTAGGCCTGTGGCTACAGCTCCGCG  
ATTGACCCCTAGCCTGGGAACCTCCATAGGCCACAGGGGCGGCCCTAAAACGACAAAAGACAAAAAAAAAAAAAAGAGA  
AAAAAGAAAAAACAGATGAGAGGAACTTTAAAAAACCAATGGCTTTTACAAGTTAAAATGCAAGGTTGGTAAACTAC  
AGAAAAATAAGCTTACCATGAGCTCACACTTGATACACTTGATAAGGAAAGAAAGGTATGAACCTAGTATTCAATGGAG  
GCATGGGGGGTTCGAGAAGGGAGACTTTAGCTAATCCCTGTGAAATCCCAGACTCAGAGTGTGCCCATCTCTGCTAAGTGTT  
GGGGCTGGGAGGGTCTGTACCCAAGACGTGCAGAGCTCAGTCCCTGTGGCAGGTGCTCCCCAGCCGTGCTGACCTTGCT  
GGTCTCGGGGCTCCAAGCTGAGGGTCCAGACTCAGGATGCAGCTCAAGGTCAGGTGGATTCCCTGATCAGTTTGCCAC  
AGGGAGGCAACGGTGGCCTCGCAAACATACACGGGCTTCACCCCATACCTCCTTATGGTTTCCATAGCTCATGAAGGAGT  
TTTCATGCTGAGTGTACATCTTCAGCTTGAGACAGAAACATAACTGGGTTCATGGAGAAAATGGCTTTTCTGACTAA  
CATTAAAGAGAATACCAACATTGAAAATAGGTAGAACAGATACTGTAGTGTGAGGATTCCCTGCATCCACTTGTTCCTTTT  
TGGAAAAACAGTGACTGAAATCCTGCCATAGAGCAGGCACTGTGAGTAAGACCATCCTGCGTAATAAAGCCTGGAAGT  
CAGCTGGGAAAGTCAAGGAGAGACAAACCACACTGGATCTACAGGAAAAGACTGGAACACATCCGGTAACTATCTAGA  
GTCTGTGGGCAGGTGGATGGCCGATATGTACAGATTTTTAAGTGAAATGTTAAGGGAGAAAAGAGCAGAACCTGAGAGTG  
CATGCACACACCCATTACATCTGCGCACAAGTGGGCATGAATGAAGATCAAACGAATATTTGAAGTGACCCCCCACCCA  
GAGCAAGTATAATTGGCTTAAGAGCTCTACCTTGAGCACCCACAGTCTCCAGGGGCTGTTCTAGGTGTATGCTGTTCTGCT  
GCCAACACTGGGCACAAGAGAGACACCAGGAACAAGAGAAACAAAAATTGCTGCCCTCCTGGTATTTATGCCCTATGGG  
AGAATAGATGAAATACACAAGCAACGGAACAAGACAATGCCTGTGTATATCACCTGCGGGAACGGGCACCATCTTAGCT  
GTAGGACTCTAGGGGGTCAGGTATGTGTACTTTCATGCAATCACCAACCAGACCAAGATAGGGAAGTGTGAGGAATTCCC  
ACCGTGGCAGAGCAGAAAAGAACCAACTAGTATCCATGAGGATGTGGGTTCGATCCCTGGCCTCGCTCAGTGGGTAAAG

GATCCCGTGTGGCCATGAGCTGTGCTGTAGGTTGCAGACACGGCTCAGATCTGGCGTTGCTGTGGCTGTGGTGTAGGCCGG  
CCGCTGCAGCTCCAAATTGACCCCTAACCTGGGAATCTCCATATGCCACAGGGGCAGCCCTTTAAAAAAAAGCAAGATA  
GAGAACTTTCCAGCACTGCTCCATCACTGGTCAGCTGACCTCTGACCTCTGTCGCCTTGGAGTCATCTTGCCTATTGGTCAT  
GTGAAGGGAATGAGGTAGTCAGTACTCTTTTGTGACTACACCTTCTGTGCATTTGTGTCTGTGGGAATCACTGTGGCTGTT  
GCTGTGTGTTGCAATAGCCCTCCCATTGTCATTGTAGGGTGTGTATTGTATAGCCTTCCGTCATGTGACTAAGGGGTTTGTA  
AGAACATATCACCGTTCATGGGTCCATTGTCACTCGCACTGAATCACATTTGAAACGTTGCTAGTTTGCGGCTTCTTAGAAT  
AAAGCTTCTTTGAATATGACTGTCCCTGTCTTTTGAATGCATGAGCATGAGCACACAGCCCTATTGGTATCTGACAAGGC  
AGGGGTTCCAGGGGCAGAAGGCCTTACACACTACTGGTTTCCCAAAGGAGGTGTCCCACCAGCGGTGAATGATGGTTTAA  
GGTACTCCTCGTAGTCAAGACCTGTTGTTGGTCTTTTACATTTGAGCCTATGTGGGGATCTCCTTGGATTAACGTTGCTCGTA  
ACTTCTCCAAATCCGGTGATGTCAGGCACGCTTCCCTATGCTTCTTGACTTTTGGGAAAGGCCGTTCCAGACTTGGGCCTTT  
TGATCATTGGGTGATAGGCTTGGCTATGCATTTTTGGAGATGTGTCCTTGGTAATTTGCAATAGATTTTCCCGGCTGAGCCTT  
GTCTACATGCTGGACCCCCAAGCCAGCAACTCTATAGAGTAGCACACTTTGGGAACACCTGAGCTCCTAGAACTTCCTCT  
TAAGCAGACCGCTGGCCACGTGCTTGGAAATTGCTTCCAGAGGATGCAGTGCAGAGGACGCATGGTGACTGGTCGATCA  
GAGACAGGAAACATATACCTAGGATGTTACGGAAGGGTGTGAAGTAGGAACCAACAGTCCCCAGATCCGTACATTGAC  
TTAAGACTTGGATACCCCGCAATGGCAAAAGGAAGCAAAAAAATATATATATAAGCATCTTCAGTTAAAGAAGAAAAA  
AAAAAAGGCCATCTACCAGAGAGTCACGGAAGACGGGCCTCACCTTCTCGGAACACCGCTGAATTCTAGAAGCTCTGA  
CTCCCTCAGAGGTCTGGGAGCTTCATCCTAGAATGTATGCGCAGCCAAAATCCTAGTTCAGTGTCCACGAGCACGACATTT  
CCACATATGCAAGGACTAACGCCACTTACTCGTGAGGAGCTCAGAAAATGCGGGCAGACAAGAAGGTCCCGAGTGGCAG  
CTGTGCAACAGCCGGGACAGGGCGCTTTGGGGGCGTCTGAGGAAAGAGTGCAGACAGGATCCCAGACATTACAGAGGTG  
CTGAAGCCACACGTCTGGAAGGACAAAGACTCCTGTCCCTGCCACAGGGGATTCCCAGCACTTCTGGCCTCACCCACAAA  
GACACACGGCGCTACAGAACCATGAGCTCTTCACAACCCAGGACGAAGGAAGGAGAAACGGTGGCTGCGGAAGAGGCC  
GCCCTTCTACAGAGCGTGCCCGGAGGATTCTTGCTCGAGGCGTCCCCAACAGGAACAAGAAATCTCAACACCCCTCAAGC  
CCAGACAGCATCGCCAGGCACCCGCCTAAGACAGTGTCCCCACTCAGGCCCCAGGAAGCAGCAGGGCTGCTTGGAGAGC  
TCAGGGGGGCCCCGAAGGGAAAAAAGATACCACACAGCAGGTGTGAGTGAGGCTTTACTGCTGATCAGGCAGGGCTGGG  
TGGGGACCACACTGGGGGAGCAGGGCCTACATGCCGGGTGAGGGCTGGTCTTCAGGGCAGGGCTGGGCAGCTCAGGACT  
GAGCCCCACAGGCAACGGCCAGGCTCCACACGTGAGGCCTGAGCTCTCCAGGTCAGGCTGCTCACAGCAGGAGCAAGCA  
CAGAAAGGAAGGCGGGTCTGGTTGGCCTCAGAGCAGAAAGGATACCTTCAGCTGCTGACTTCACGGCAGAAGGGCGGGA  
GGCTGCAGAGCGCTCAAGATCCTGGTGAATGCAGCCTGGGAAAGGCTTAGGGGCCACGTGAGGCCTGATGGGAACAAGG

AGGACAAGCAAGACGTCTGGTCGTGGGCTGCAGGGAGGGCCAGCTGTCCTCCAGGGCCTGGTCCTCACTCCATCTCCTGC  
TTCCAGGGCACTACTTGTTGCCCCATGTGGCCACCTTTGTATACACGGGGTGTGGCAGGAAGCGGCTGGACCTCATGTAGG  
CTGAGATCCTCTCCAGGCCCTCAAAGCGGCTGAGGAAGGCTTTCAGGTTTGGAATTCATCCAGGCACTTGGGATCAAAT  
ATGCGGTACAGGTCAAGGACATCGTAAGCCAGGAAATCCACATAGGTGAGCTGCAGAAAGGCAAAGCGTGCATGGGCAC  
CAAACGCCGAACCTGCGAAAAATGACAACCCCGGGTCCCCAAAGCCGTCCCCTTACCTTGTCCCCTGCAAACCAAGGCCT  
CTTCCCCAGAACTCGGAGAAGGGCTTCATCTTTTCAGGGATCTCCTTCAAGTACCCAGGCTTCAGTTTCTCCTGAGGCAC  
AAAACAGCTGTCACCACCCTCACACACAGACTCCCTGGCACACAGCAGGCCTCCCAGGGCTGGGCCGGATCCCAGCTGCC  
AGCGAGCAGCCACGTCCCCCGACGGCACCTGTTTCGGTGCCAGGCTATGCTTTAACCCACTGTGGTCATTAGAGTCCTAC  
TGGGTCCCACCTCCACCTGTGAGAGGGGAACGGAAGGCAAAGGGCAAAGCCACCCTGTCCCTGAACCCGTCACCACTCA  
GCTCCAAACACCTGCCATGGGTCAGACCAGCAGCGCTGTGAGACCTGGCAGAGCTCAGGCCTCAGCCCTCAGGCACATCA  
ACACTCAAATGATTTCGGGAAGGAAGAGCCTCTACGAAGCACTGCAAAGAGGGGGTAGAAATGCTGTGGATGCCTGAGCA  
GTTTCTGGACAGTAGAGGAGAATCTGAGAGGCTGAAAGGAAGGAGGGAGAGGAACCAAGCTGGACCCTGTGCTGCCTAC  
TGGACACAAGGGCTGACGCCTGAGATGCCCAGGAGGAGGCACTGGTCTGACGCAGTAAACACCCTGTCCAGGAAATGGG  
AAAAAAAAAAAAAAAAAAAAAAAAAGAAAAAAAAAAAAAAAAA
